# Supplementary material
Source: Springer Nature journal article supplement (https://www.springermedizin.de/resource/supplementary/12913_2013_2807_MOESM3_ESM.pdf/9531506)

**a: ICER (Costs per HZ-case avoided)**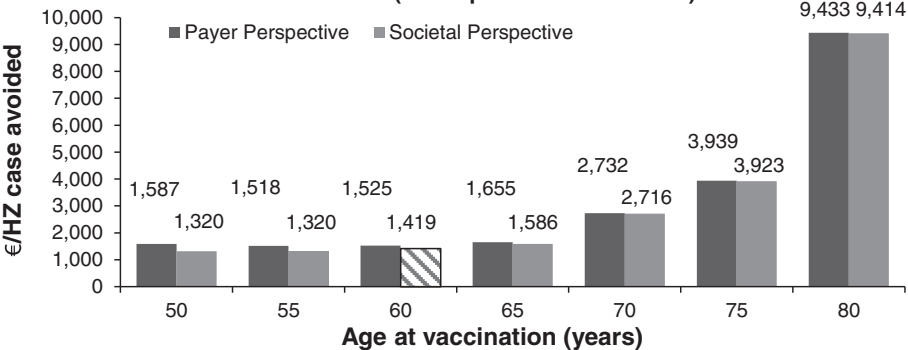**b: ICER (Costs per PHN-case avoided)**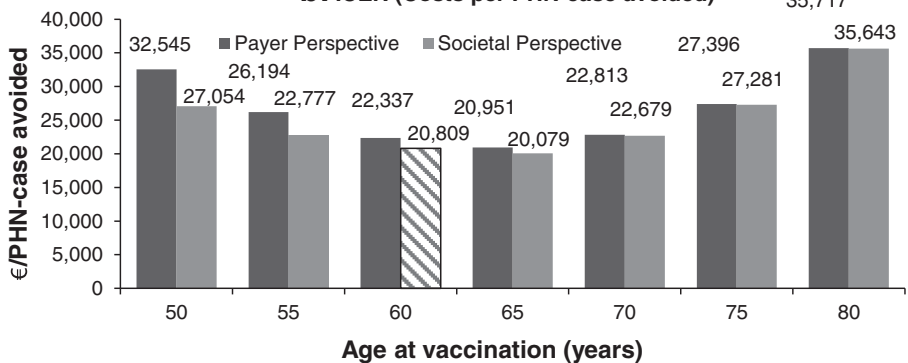**c: ICER (Costs per QALY gained)**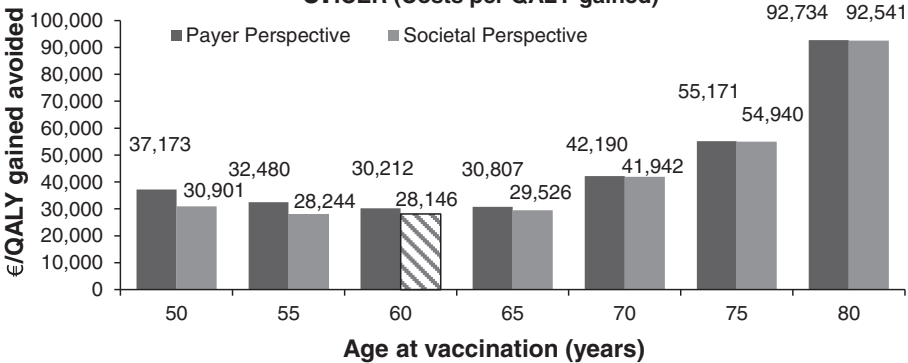

Supplement: MOESM3 [file 9531506]
